# Supplementary material
Source: MDPI journal article supplement (https://www.mdpi.com/2071-1050/7/4/4120)
Supplement: s1 [file s1]

## Supplementary Materials

### Section 1. “CSR”

(1) Specify the level of importance of the following measures addressed to promoting CSR integration in your business strategy:

|                                                                        | 1 | 2 | 3 | 4 | 5 |
|------------------------------------------------------------------------|---|---|---|---|---|
| (a) Cultural development promotion and dissemination of good practices |   |   |   |   |   |
| (b) Code of Practice drafting                                          |   |   |   |   |   |
| (c) Informative campaigns and training                                 |   |   |   |   |   |
| (d) Promotion of dialogue with stakeholders                            |   |   |   |   |   |
| (e) Promotion of product labelling                                     |   |   |   |   |   |

1 = Not important; 2 = Not very important; 3 = Rather important; 4 = Important; 5 = Very important.

(2) Which of the following activities your company performs regularly?

|                                                                                                 |  |
|-------------------------------------------------------------------------------------------------|--|
| (a) Provide services to employees                                                               |  |
| (b) Check the ethical and social aspects of the products                                        |  |
| (c) Implement environmental protection measures                                                 |  |
| (d) Support Fair Trade                                                                          |  |
| (e) Provide contributions to the community ( <i>i.e.</i> , support local cultural associations) |  |
| (f) Make direct investments into the local community                                            |  |
| (g) Investing in ethic funds/securities                                                         |  |

(3) Did you succeed in obtaining following certifications?

|                   |  |
|-------------------|--|
| (a) ISO 9001:2000 |  |
| (b) ISO 14001     |  |
| (c) EMAS          |  |

(4) Is one (or more) of the following CSR tools adopted in your company?

|                            |  |
|----------------------------|--|
| (a) Social Report          |  |
| (b) Environmental Report   |  |
| (c) Codes of Ethics        |  |
| (d) Other (please specify) |  |

### Section 2. “SA8000”

(5) Specify the importance level of the following aspects that influenced you in deciding to start SA8000 certification path:

|                                            | 1 | 2 | 3 | 4 | 5 |
|--------------------------------------------|---|---|---|---|---|
| (a) Attracting qualified personnel         |   |   |   |   |   |
| (b) Attracting new customers               |   |   |   |   |   |
| (c) Acquiring competitive advantages       |   |   |   |   |   |
| (d) Improving company image and reputation |   |   |   |   |   |
| (e) Increasing employees satisfaction      |   |   |   |   |   |
| (f) Protecting the brand                   |   |   |   |   |   |
| (g) Obtaining better credit conditions     |   |   |   |   |   |

1 = Not important; 2 = Not very important; 3 = Rather important; 4 = Important; 5 = Very important.

(6) Specify the level of difficulties encountered implementing SA8000 certification path:

|                                                                | 1 | 2 | 3 | 4 | 5 |
|----------------------------------------------------------------|---|---|---|---|---|
| (a) Cost-benefits assessment                                   |   |   |   |   |   |
| (b) Finding specific skills                                    |   |   |   |   |   |
| (c) Employees engagement                                       |   |   |   |   |   |
| (d) Suppliers involvement                                      |   |   |   |   |   |
| (e) Plan the implementation phases                             |   |   |   |   |   |
| (f) Implement the operational control                          |   |   |   |   |   |
| (g) Document management                                        |   |   |   |   |   |
| (h) Internal audits                                            |   |   |   |   |   |
| (i) Management of non-compliance                               |   |   |   |   |   |
| (j) Relations with the Certification Body                      |   |   |   |   |   |
| <b>Obtaining economic resources to cover costs related to:</b> |   |   |   |   |   |
| (a) Consultancy                                                |   |   |   |   |   |
| (b) Certification                                              |   |   |   |   |   |
| (c) Staff training                                             |   |   |   |   |   |
| (d) Suppliers evaluation                                       |   |   |   |   |   |
| (e) equipment and control devices                              |   |   |   |   |   |
| (f) salary increases and services to employees                 |   |   |   |   |   |

1 = Not important; 2 = Not very important; 3 = Rather important; 4 = Important; 5 = Very important.

(7) Actions taken to comply with the standard:

|                                                                               |  |
|-------------------------------------------------------------------------------|--|
| (a) Accident reports                                                          |  |
| (b) Creation of joint committees to resolve conflicts                         |  |
| (c) Grant of working hours to participate to trade unions meetings            |  |
| (d) Guarantee religious holidays other than Catholic                          |  |
| (e) Grant time off                                                            |  |
| (f) Nominate Workers Representative to manage workers vs. management disputes |  |
| (g) Bonus                                                                     |  |
| (h) Drafting pay slip in workers' mother language                             |  |
| (i) Definition of a company disciplinary code                                 |  |
| (j) Definition of procedures for filing complaints by workers                 |  |
| (k) Awareness programs addressed to customers and suppliers                   |  |
| (l) Collection of information on suppliers                                    |  |
| (m) Visits to suppliers to assess their compliance                            |  |
| (n) Transparent access to productive sites and Company SA8000 documents       |  |

(8) Specify the importance level of benefits gained thanks to SA800 certification:

|                                                         | 1 | 2 | 3 | 4 | 5 |
|---------------------------------------------------------|---|---|---|---|---|
| (a) Improvement of corporate image and reputation       |   |   |   |   |   |
| (b) Improvement in relations with employees             |   |   |   |   |   |
| (c) Attraction of qualified staff                       |   |   |   |   |   |
| (d) Obtaining competitive advantages                    |   |   |   |   |   |
| (e) Suppliers engagement                                |   |   |   |   |   |
| (f) New costumers acquisition                           |   |   |   |   |   |
| (g) Brand protection                                    |   |   |   |   |   |
| (h) Obtaining better financial and insurance conditions |   |   |   |   |   |
| (i) Facilities in permits                               |   |   |   |   |   |

1 = Not important; 2 = Not very important; 3 = Rather important; 4 = Important; 5 = Very important.

### Section 3. "General Information"

(9) Number of Employees: \_\_\_\_\_

(10) What market aims mostly your sales?

|                    |  |
|--------------------|--|
| (a) Local/Regional |  |
| (b) National       |  |
| (c) International  |  |

(11) What is your firm international level?

|                                                 |  |
|-------------------------------------------------|--|
| (a) None branch abroad                          |  |
| (b) One branch abroad                           |  |
| (c) Two/Three branches abroad                   |  |
| (d) At least one branch in a developing Country |  |

(12) Please, share in percentage your suppliers origin:

|                        |  |
|------------------------|--|
| (a) National           |  |
| (b) EU                 |  |
| (c) International      |  |
| (d) Developing Country |  |
